# Supplementary material for: A new aggressive xenograft model of human colon cancer using cancer-associated fibroblasts
Source: PeerJ. 2020 Jun 3;8:e9045. doi: 10.7717/peerj.9045 (PMC7275677; doi:10.7717/peerj.9045)
Supplement: Supplemental Information 8 — Cultures time and tumor characteristics. [file peerj-08-9045-s008.xls]

## Sheet: cultures time
GROUP	CASE	TIME	VALUE	COLON	FIBRO
N	1	0	10000	34	1
N	1	2	27500	34	1
N	1	4	41250	34	1
N	1	6	96000	34	1
N	1	8	120000	34	1
N	1	10	135000	34	1
N	1	12	117500	34	1
N	1	0	10000	40	1
N	2	2	22500	40	1
N	2	4	42500	40	1
N	2	6	48750	40	1
N	2	8	60000	40	1
N	2	10	58750	40	1
N	2	12	63750	40	1
N	3	0	10000	49	1
N	3	2	17500	49	1
N	3	4	21250	49	1
N	3	6	31250	49	1
N	3	8	46250	49	1
N	3	10	51250	49	1
N	3	12	55000	49	1
N	4	0	10000		1
N	4	2	13750		1
N	4	4	28750		1
N	4	6	37500		1
N	4	8	43750		1
N	4	10	48750		1
N	4	12	51250		1
PT	5	0	10000	34	2
PT	5	2	41000	34	2
PT	5	4	121000	34	2
PT	5	6	325000	34	2
PT	5	8	400000	34	2
PT	5	10	525000	34	2
PT	5	12	340000	34	2
PT	6	0	10000	40	2
PT	6	2	110000	40	2
PT	6	4	98750	40	2
PT	6	6	126250	40	2
PT	6	8	220000	40	2
PT	6	10	255000	40	2
PT	6	12	271500	40	2
PT	7	0	10000	49	2
PT	7	2	31125	49	2
PT	7	4	41250	49	2
PT	7	6	50250	49	2
PT	7	8	106500	49	2
PT	7	10	122500	49	2
PT	7	12	157500	49	2
PT	8	0	10000		2
PT	8	2	23750		2
PT	8	4	51250		2
PT	8	6	58750		2
PT	8	8	91250		2
PT	8	10	125000		2
PT	8	12	165000		2

## Sheet: characteristics
MOUSE	GROUP	HEPATIC_TUMOR_BURDEN	PANCREATIC_TUMOR_SIZE	PANCREAS_FOCUS	LIVER NODULES	LUNGS_METAS	ID	SEVERITY
RH1	0	12	91.6	4	6	5	1	4
RH2	0	1	3.7	3	1			3
RHFN1	1	10	65.3	3	5		1	6
RHFN2	1	6	239.6	1	2	10	1	8
RHFN3	1	7	28.2	1	4		1	5
RHFN4	1	4	8	1	3		1	5
RHF1	2	15	76.9	1	9	2		5
RHF3	2	14	563.6	1	7	1	10	7
RHF4	2	6	154.8	1	2		10	7
RHF5	2	14	93.7	1	11	4		7
RHF6	2	10	169.9	2	5		10	8
RHF7	2	9	207	2	3			7
RHF8	2	9	144.4	1	6	7		7
	3	12	91.6	4	6	5		4
	3	1	3.7	3	1			3
	3	10	65.3	3	5			6
	3	6	239.6	1	2	10		8
	3	7	28.2	1	4			5
	3	4	8	1	3			5
